# Supplementary material for: Violet phosphorus quantum dots as an emerging visible light-responsive photocatalyst for an efficient hydrogen evolution reaction
Source: Royal Society of Chemistry journal article supplement (doi:10.1039/d3ta02021e), 2023-01-01
Supplement: d3ta02021e1.pdf [file d3ta02021e1.pdf]

## Supporting Information

# Violet Phosphorus Quantum Dots as an Emerging Visible light-responsive Photocatalyst for Efficient Hydrogen Evolution Reaction

*Xin Wang,<sup>\*a</sup> Chang Xu,<sup>b</sup> Ziyou Wang,<sup>a</sup> Yan Wang,<sup>a</sup> Xuewen Zhao,<sup>c</sup> Jinying Zhang,<sup>c</sup> Ming Ma,<sup>a</sup> Quansheng Guo<sup>b</sup> and Fuxiang Zhang<sup>\*d</sup>*

<sup>a</sup> X. Wang, Z. Wang, Y. Wang, M. Ma

Shenzhen Institute of Advanced Technology  
Chinese Academy of Sciences  
Shenzhen, 518055, China  
E-mail: [xin.wang2@siat.ac.cn](mailto:xin.wang2@siat.ac.cn)

<sup>b</sup> C. Xu, Q. Guo

School of Materials Science and Engineering  
Hubei University  
Wuhan, 430062, China

<sup>c</sup> X. Zhao, J. Zhang

State Key Laboratory of Electrical Insulation and Power Equipment  
Center of Nanomaterials for Renewable Energy  
School of Electrical Engineering, Xi'an Jiaotong University  
Xi'an, Shaanxi, 710049, China

<sup>d</sup> F. Zhang

State Key Laboratory of Catalysis  
Dalian Institute of Chemical Physics  
Chinese Academy of Sciences  
Dalian 116023, China  
E-mail: [fxzhang@dicp.ac.cn](mailto:fxzhang@dicp.ac.cn)

## Results and Discussion

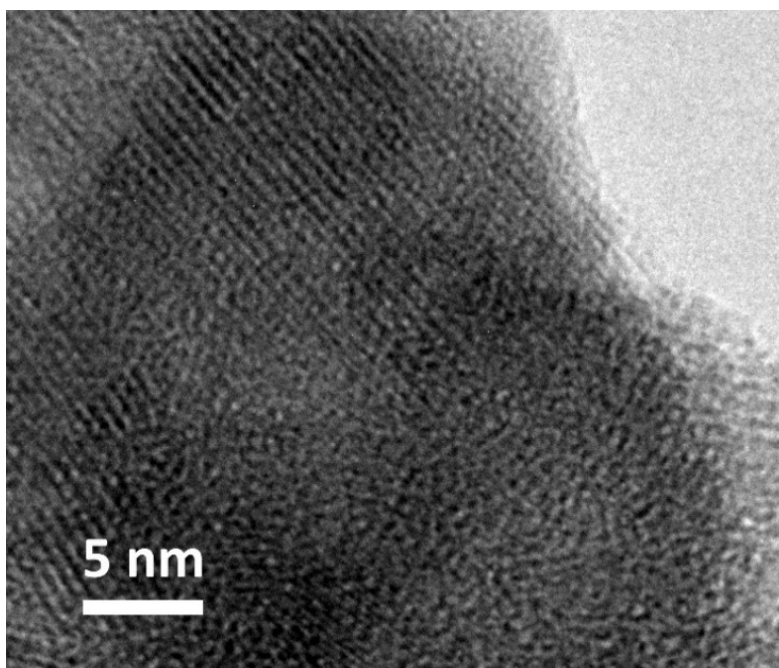

**Fig. S1.** HRTEM image of VP crystals.

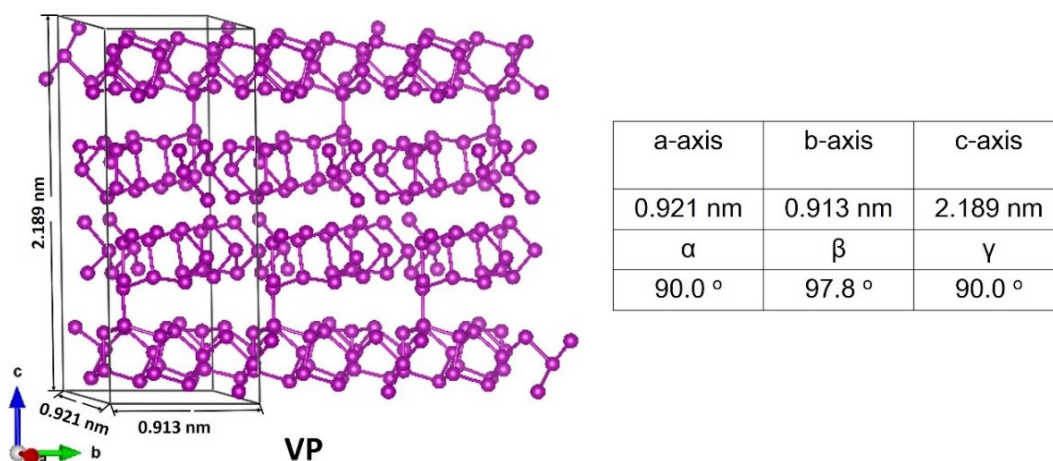

**Fig. S2.** The crystal structure of VP shown using ball-and-stick models and the corresponding unit cell parameters. The crystal structures were visualized using the VESTA suite of programs.<sup>[1]</sup>

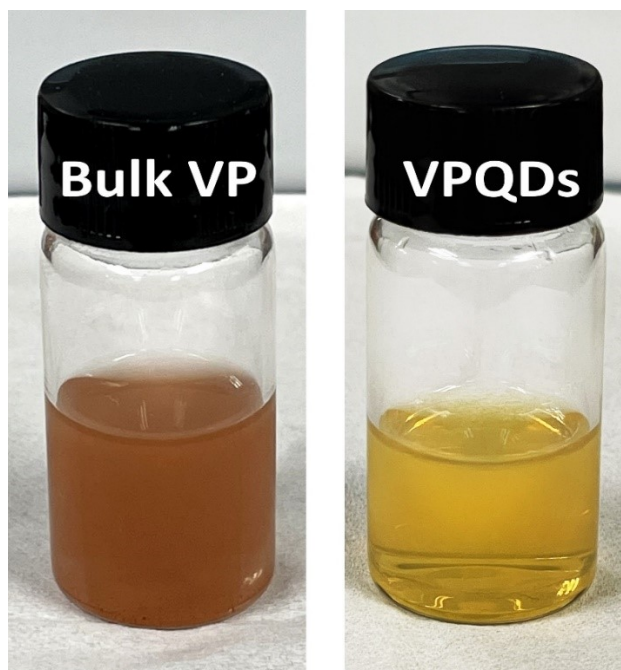

**Fig. S3.** Photographs of bulk VP and VPQDs dispersion.

**Table S1** Yields of VPQDs obtained after centrifugation at 3K rpm for 20 min.

| Sample | $m_0^1$ (mg) | $m_g^2$ (mg) | $\Delta m^3$ (mg) | Yield (%) |
|--------|--------------|--------------|-------------------|-----------|
| A      | 10.24        | 6.83         | 3.41              | 33.30%    |
| B      | 15.18        | 10.50        | 4.68              | 30.83%    |
| C      | 20.36        | 14.22        | 6.14              | 30.15%    |

<sup>1</sup> $m_0$  is the mass of the initial VP crystals.

<sup>2</sup> $m_g$  is the mass of the solid product after centrifugation at 3K rpm for 20 min.

<sup>3</sup> $\Delta m$  is the mass of the VPQDs product, calculated from the equation  $\Delta m = m_0 - m_g$ .

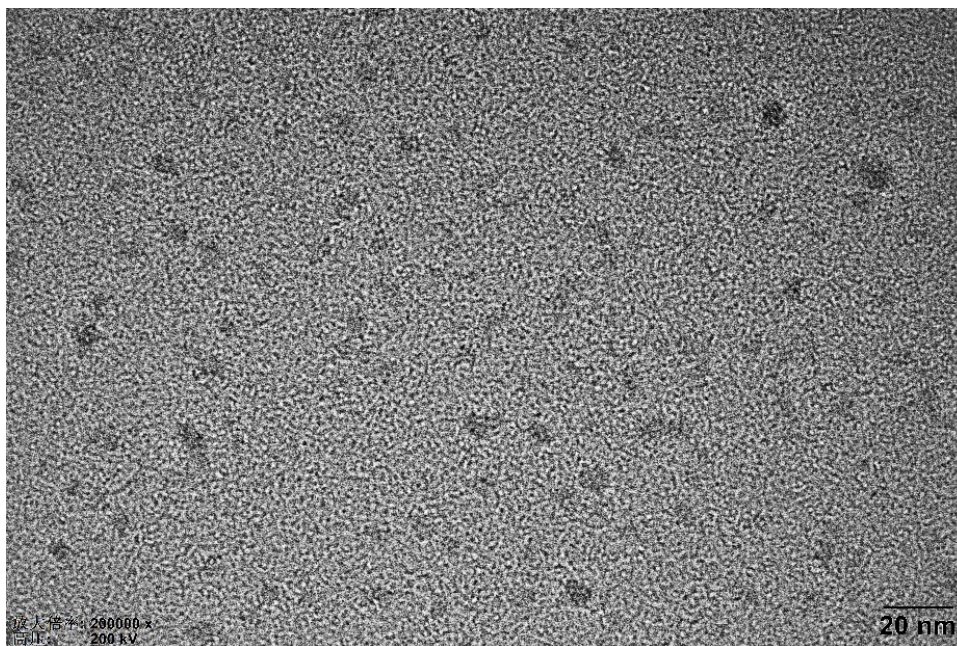

**Fig. S4.** The magnified TEM image of VPQDs.

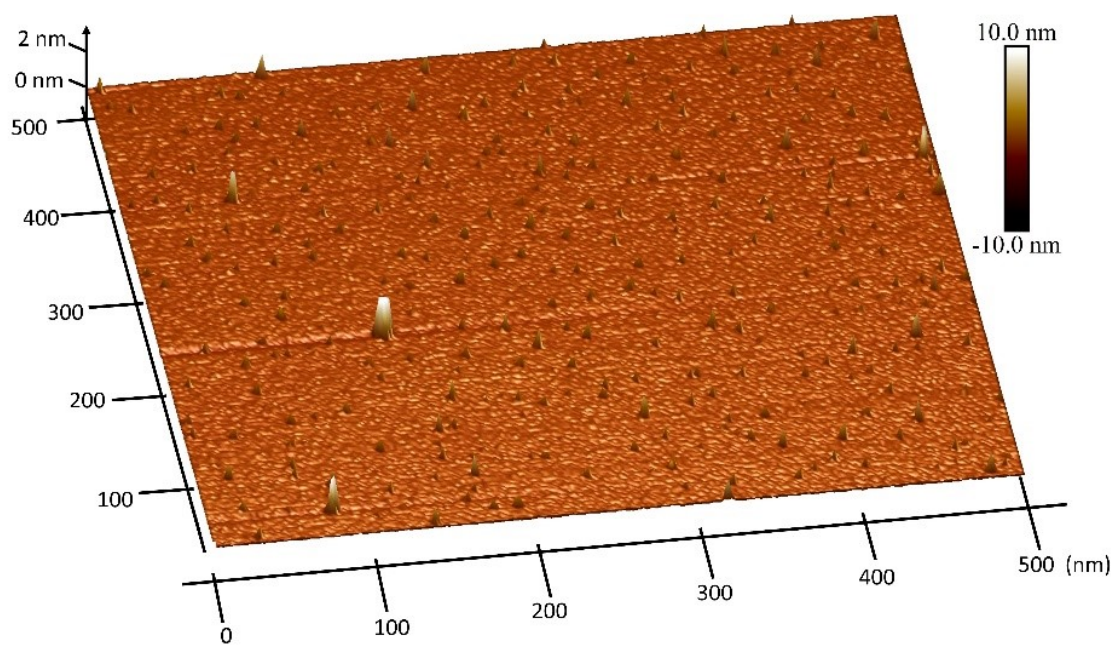

**Fig. S5.** 3D AFM topography of the as-prepared VPQDs.

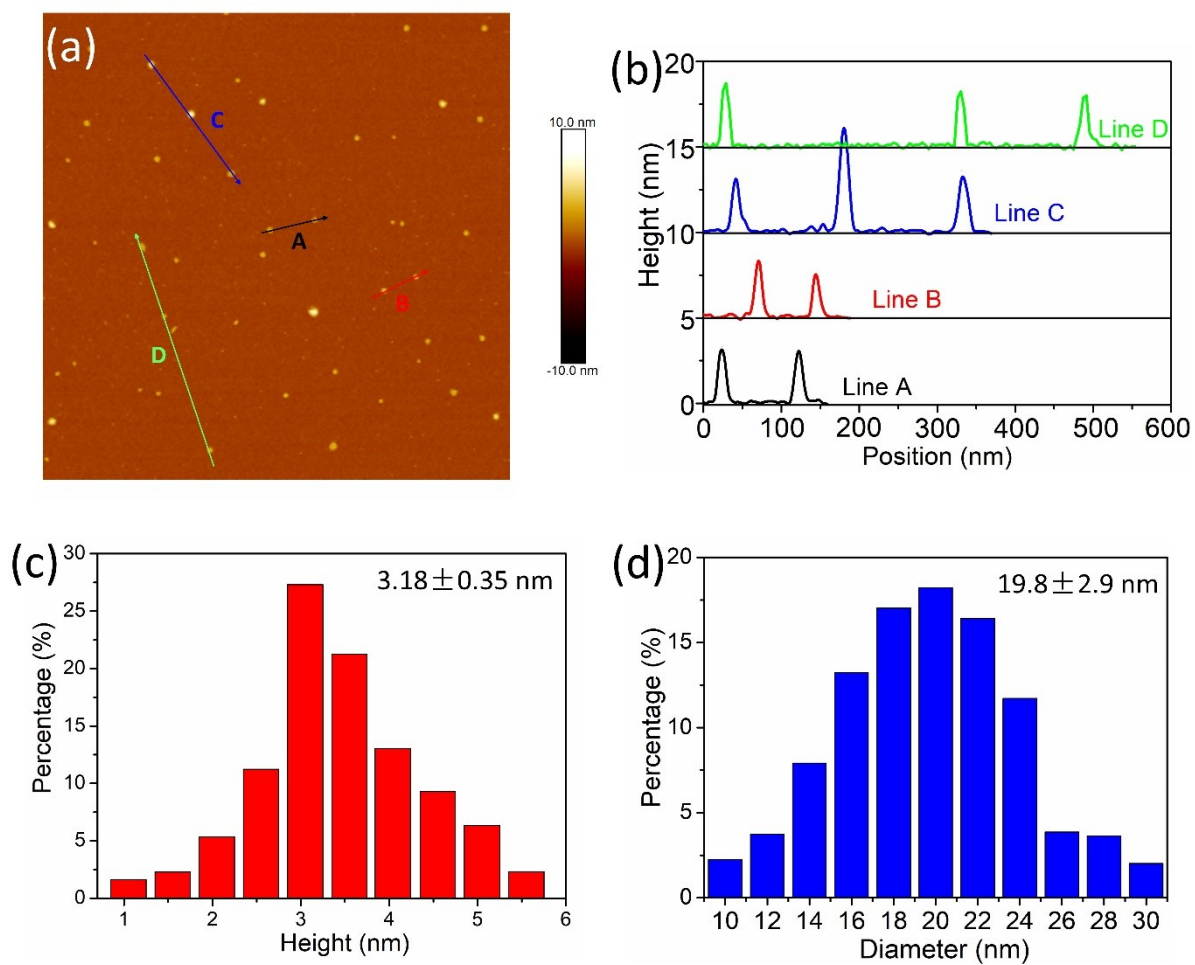

**Fig. S6.** (a) AFM images of VPQDs obtained at centrifugation ranges of 7-9 k. (b) Height profiles along line A, line B, line C and line D in a. (c) Statistical analysis of the heights of VPQDs measured by the AFM image in a. (d) Statistical analysis of the lateral sizes of VPQDs measured by the AFM image in a.

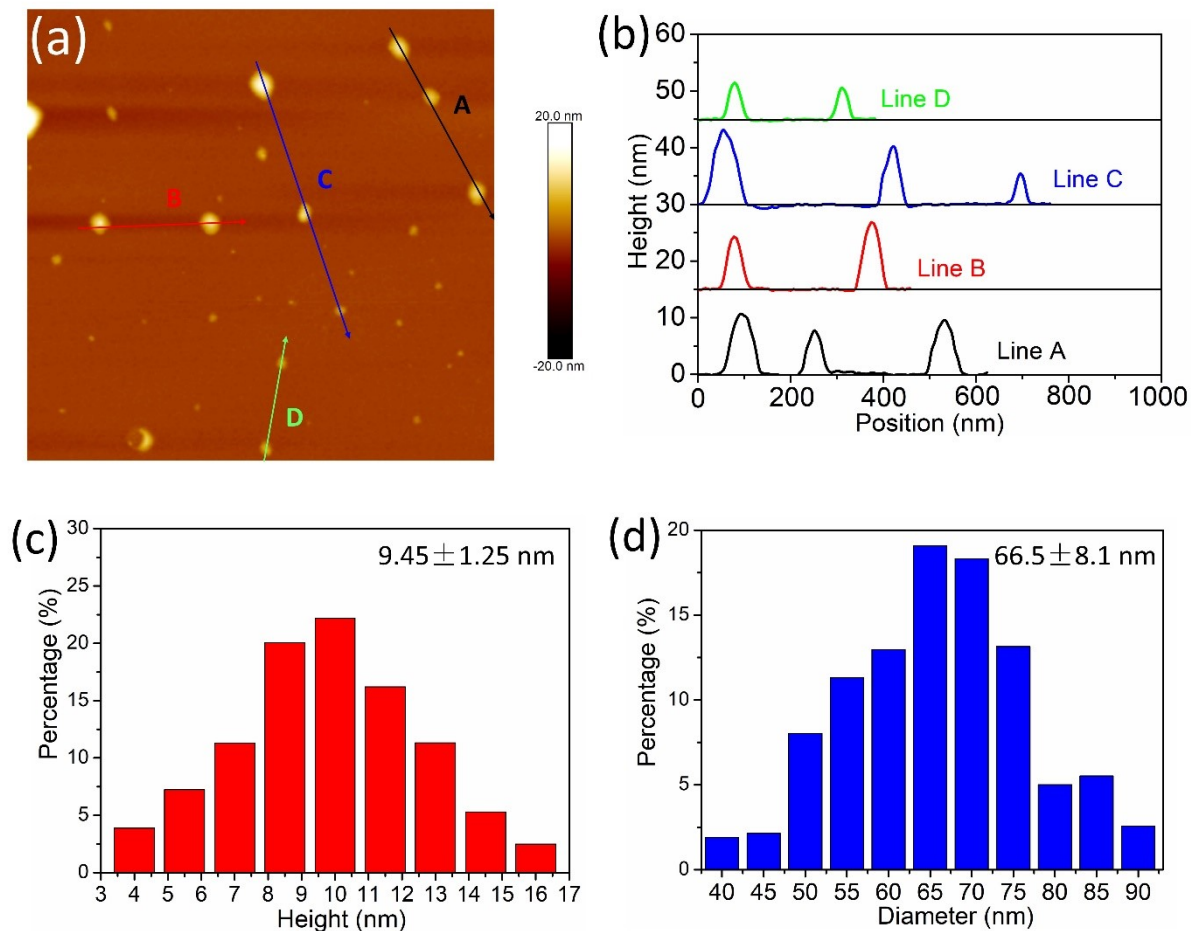

**Fig. S7.** (a) AFM images of VPQDs obtained at centrifugation ranges of 5-7 k. (b) Height profiles along line A, line B, line C and line D in a. (c) Statistical analysis of the heights of VPQDs measured by the AFM image in a. (d) Statistical analysis of the lateral sizes of VPQDs measured by the AFM image in a.

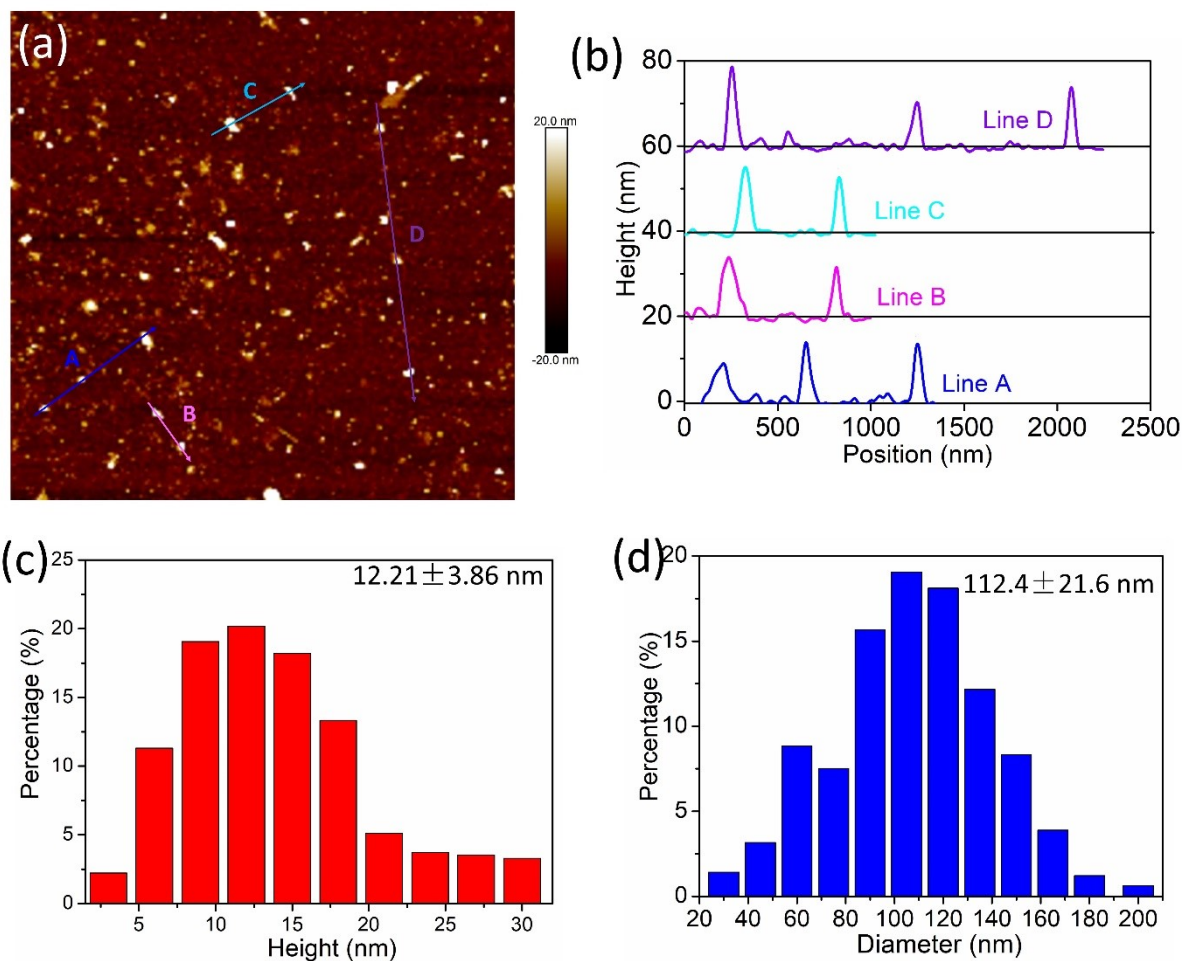

**Fig. S8.** (a) AFM images of VPQDs obtained at centrifugation ranges of 3-5 k. (b) Height profiles along line A, line B, line C and line D in a. (c) Statistical analysis of the heights of VPQDs measured by the AFM image in a. (d) Statistical analysis of the lateral sizes of VPQDs measured by the AFM image in a.

## XPS spectra

Fitting analysis shows that the P 2p peaks can be deconvoluted into five peaks at 129.6, 130.5, 131.7, 133.4 and 134.5 eV. The peaks at 129.6 and 130.5 can be assigned to P 2p<sub>3/2</sub> and P 2p<sub>1/2</sub> of the P=P bonds. Moreover, the peaks at 131.7, 133.7, and 134.5 eV can be ascribed to the oxidized phosphorus of P-O-P (bridging bonding), O-P=O (dangling bonding) and P<sub>2</sub>O<sub>5</sub>, respectively.<sup>[2-4]</sup>

**Table S2.** The intensity ratio of P<sub>x</sub>O<sub>y</sub> to P=P in the XPS spectra of the bulk VP and VPQDs.

| Samples | P <sub>x</sub> O <sub>y</sub> | P=P  | P <sub>x</sub> O <sub>y</sub> /P=P |
|---------|-------------------------------|------|------------------------------------|
| VP      | 45.8                          | 54.2 | 0.845                              |
| VPQDs   | 27.7                          | 72.3 | 0.383                              |



## Raman spectra

Raman Microscopy was performed using a Thermo DXR 2xi Raman spectrometer equipped with excitation wavelengths of 514 nm. Three prominent peaks at 353, 446 and 471  $\text{cm}^{-1}$  were detected for both bulk VP and VPQDs, respectively. Among them, the Raman features at 353  $\text{cm}^{-1}$  is ascribed to the stretching vibrational modes of [P9] cages ( $S^2_{[P9]}$ ) and the Raman feature at 471  $\text{cm}^{-1}$  is due to the tangential stretching mode of [P9] along the tubular axis ( $T_g$ ). Moreover, the intensity ratio of  $S^2_{[P9]}$  to  $T_g$  was observed to change from 0.68 (bulk VP) to 0.77 (VPQDs) indicating the successful synthesis of VPQDs since the stretching vibrational modes of [P9] are affected by the surrounding molecules more significantly than the tangential stretching mode of [P9] along the tubular axis after quantum size effects.<sup>[5-7]</sup>

**Table S3.** The intensity ratio of  $S^2_{[P9]}$  to  $T_g$  in the Raman spectra of VP and VPQDs.

| Samples | $S^2_{[P9]}$ | $T_g$  | $S^2_{[P9]}/T_g$ |
|---------|--------------|--------|------------------|
| VP      | 1120.2       | 1640.1 | 0.68             |
| VPQDs   | 979.1        | 1264.1 | 0.77             |

**Table S4.** The band positions as well as the work functions of VPQDs and the bulk VP.<sup>[8,9]</sup>

| Samples | E<br>(bandgap) | $E_{VB}$ (Vs<br>vacuum) | $E_{VB}$<br>(Vs.NHE) | $E_{CB}$<br>(Vs.NHE) | Work functions<br>( $\phi$ ) |
|---------|----------------|-------------------------|----------------------|----------------------|------------------------------|
| Bulk VP | 1.88           | 6.11                    | 1.67                 | -0.21                | 4.9                          |
| VPQDs   | 2.06           | 6.16                    | 1.72                 | -0.34                | 4.65                         |

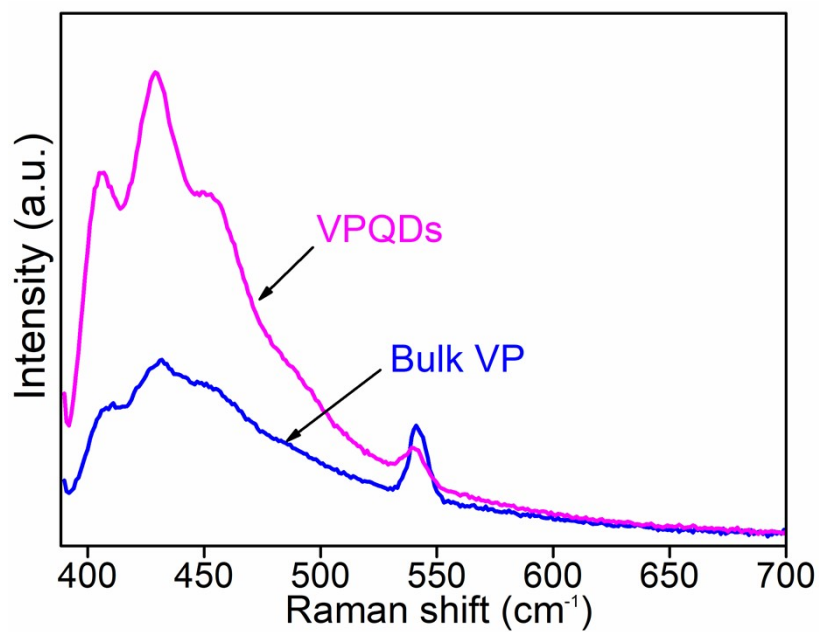

**Fig. S9.** Steady-state PL emission spectra of VPQDs and the bulk VP crystals.

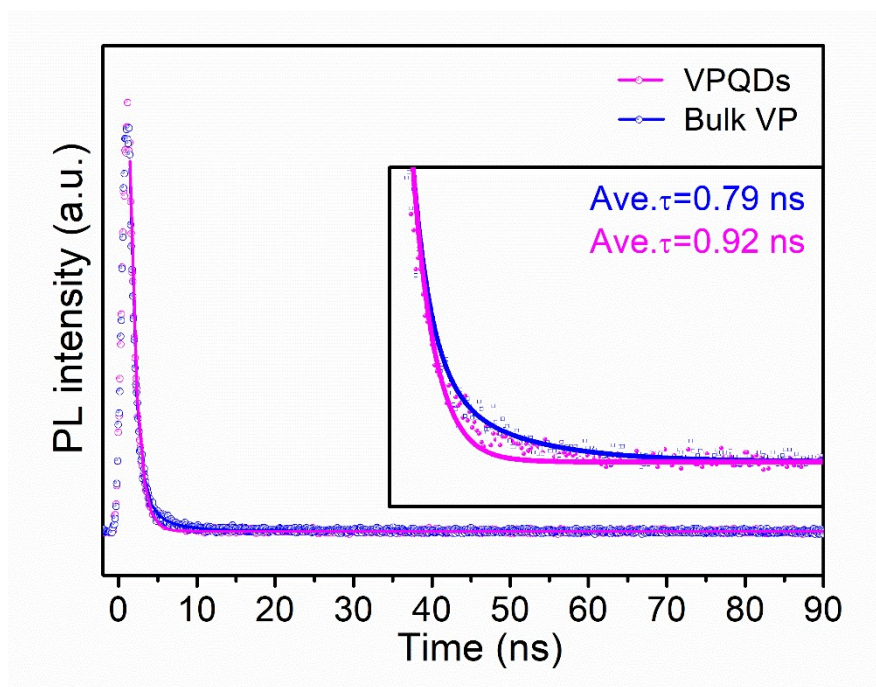

**Fig. S10.** The corresponding time-resolved PL spectra of VPQDs and the bulk VP crystals.

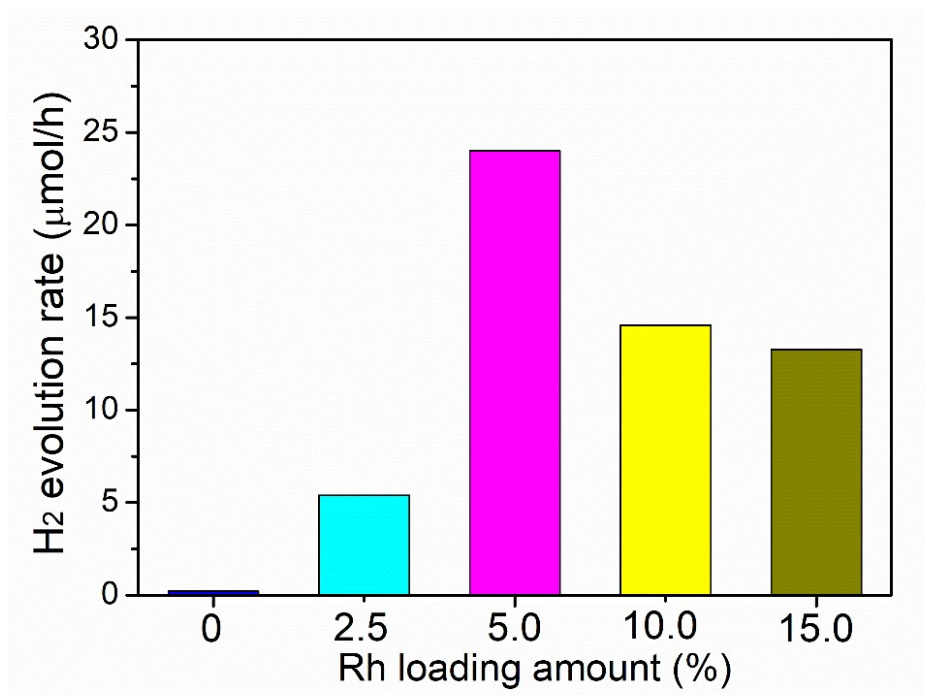

**Fig. S11.** The effect of the Rh loading amount on the photocatalytic activity of VPQDs obtained at a centrifugation range of 9–11K rpm during H<sub>2</sub> evolution. Photocatalysis parameters: solution: 150 mL aqueous methanol (20 vol%), photocatalyst: 10 mg, light source: 300 W Xe lamp, reaction cell: top-irradiation cell with a Pyrex window.

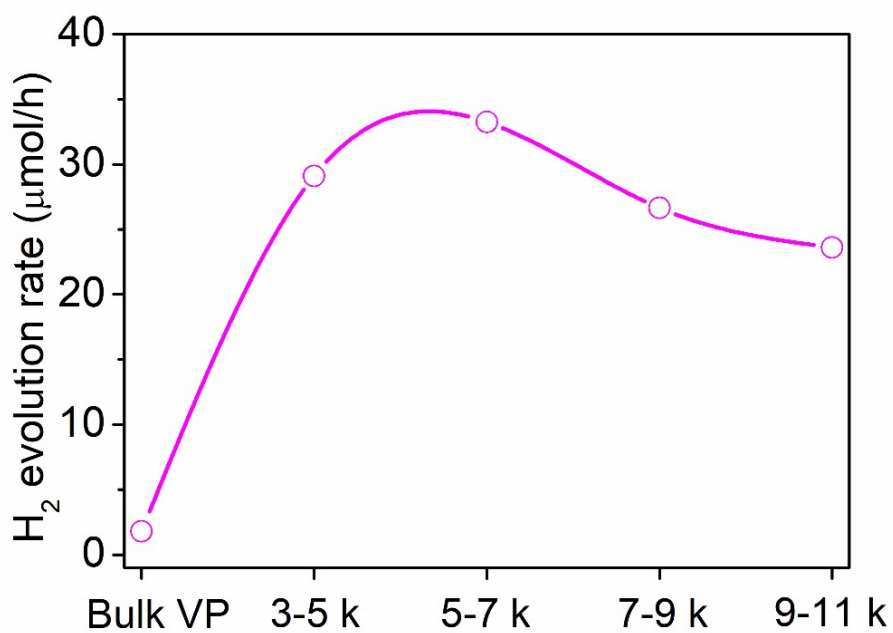

**Fig. S12.** Photocatalytic H<sub>2</sub> evolution rate over Rh-loaded VPQDs obtained at different centrifugation speeds.

**BPQDs:**

This synthesis of BPQDs was similar with the synthesis of VPQDs in the Samples Preparation Section. Typically, 20 mg of BP crystals was added in a 50 mL of NMP and treated by a tip sonicator at a power output of 40 W under 5 °C water bath conditions for 6 h. Subsequently, the resulting dispersion was sonicated in an ultrasonic bath continuously for another 5 h. As a result, BPQDs were obtained by centrifuging at 9-11K for 10 min. It was clearly found that the average lateral size of the as-prepared BPQDs is in the range of 10-15 nm (Fig. S13).

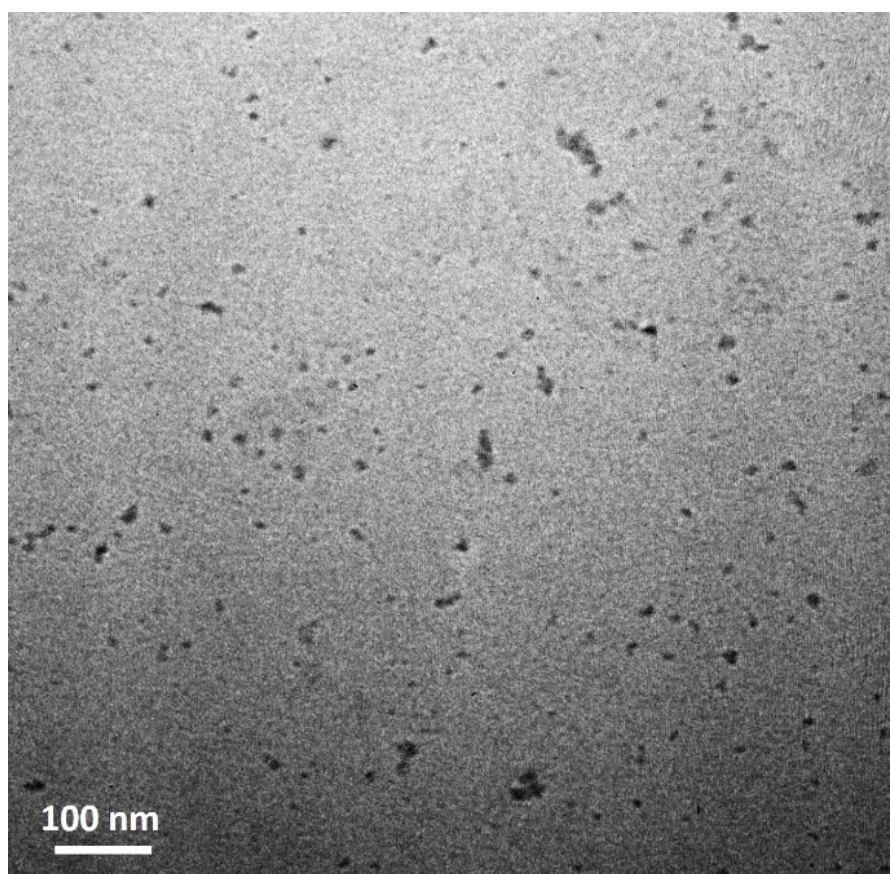

**Fig. S13.** TEM image of BPQDs.

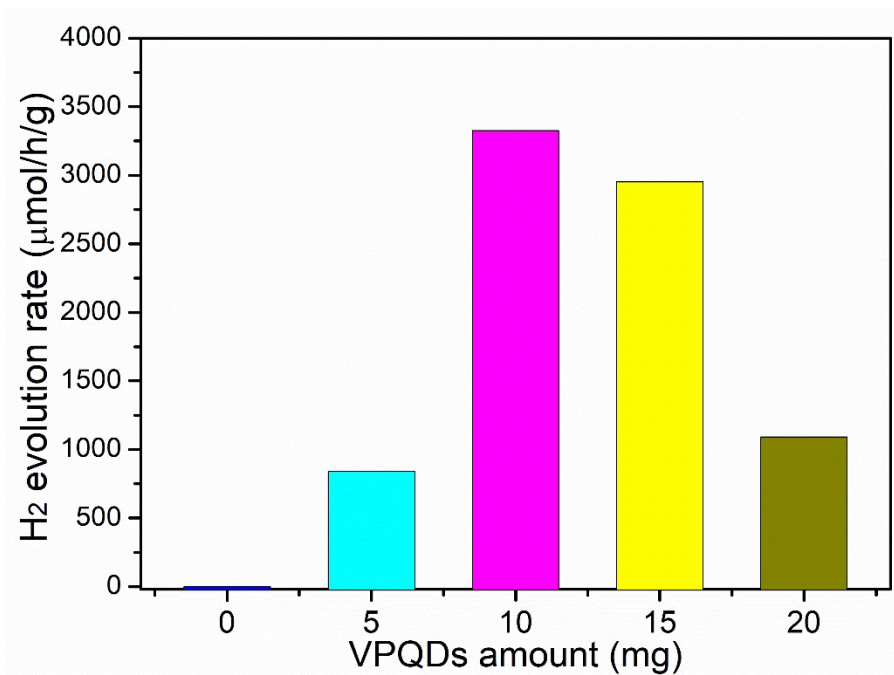

**Fig. S14.** The effect of the photocatalyst amount on the photocatalytic activity during H<sub>2</sub> evolution using Rh-loaded VPQDs obtained at a centrifugation range of 5–7K rpm. Photocatalysis parameters: solution: 150 mL aqueous methanol (20 vol%), cocatalyst loading amount: Rh, 5 wt%, loading method: NaBH<sub>4</sub> reduction, light source: 300W Xe lamp, reaction cell: top-irradiation cell with a Pyrex window.

**Table S5.** Comparison of photocatalytic H<sub>2</sub> evolution activity of 2D mono-elemental materials.

| Photocatalyst  | Cocatalyst                           | Sacrificial agent                                  | Light source                   | H <sub>2</sub> evolution rate (umol g <sup>-1</sup> h <sup>-1</sup> ) | References                                                           |
|----------------|--------------------------------------|----------------------------------------------------|--------------------------------|-----------------------------------------------------------------------|----------------------------------------------------------------------|
| <b>VPQDs</b>   | <b>5 wt% Rh</b>                      | <b>Methanol</b>                                    | <b>300W Xe lamp &gt;300 nm</b> | <b>3325</b>                                                           | <b>This work</b>                                                     |
| <b>VPQDs</b>   | <b>5 wt% Rh</b>                      | <b>Methanol</b>                                    | <b>300W Xe lamp &gt;420 nm</b> | <b>1862</b>                                                           | <b>This work</b>                                                     |
| VP             | 1 wt% Pt                             | Methanol                                           | 300W Xe lamp >300 nm           | 675                                                                   | Chem. Commun. 2022, 58, 12811 <sup>[10]</sup>                        |
| BP             | 2 wt% Ni <sub>2</sub> P              | TEOA                                               | 300W Xe lamp >420 nm           | 858                                                                   | Appl. Catal. B, 2019, 242, 422-430 <sup>[11]</sup>                   |
| BP             | 5 wt% Co <sub>3</sub> O <sub>4</sub> | EDTA                                               | 300W Xe lamp >420 nm           | 420                                                                   | Angew. Chem. Int. Ed. 2018, 57, 2160-2164 <sup>[12]</sup>            |
| BP             | N/A                                  | Na <sub>2</sub> S/Na <sub>2</sub> S O <sub>3</sub> | 300W Xe lamp >420 nm           | 512                                                                   | Adv. Mater. 2017, 29, 1605776 <sup>[2]</sup>                         |
| BP             | 20 wt% Pt                            | N/A                                                | 300W Xe lamp >420 nm           | 447                                                                   | Proc. Natl. Acad. Sci. U. S. A. 2018, 115, 4345-4350 <sup>[13]</sup> |
| BP             | 6 wt% P/Co                           | N/A                                                | 300W Xe lamp >420 nm           | 735                                                                   | Nat. Commun. 2018, 9, 1397 <sup>[14]</sup>                           |
| Crystalline RP | 3 wt% Pt                             | TEOA                                               | 300W Xe lamp >420 nm           | 96                                                                    | J. Chem. Phys. 2020, 153, 024707 <sup>[15]</sup>                     |
| Amorphous RP   | 3 wt% Pt                             | TEOA                                               | 300W Xe lamp >420 nm           | 90                                                                    | Adv. Funct. Mater. 2017, 27, 1703484 <sup>[16]</sup>                 |
| Amorphous RP   | 1 wt% Pt                             | N/A                                                | 300W Xe lamp >420 nm           | 79                                                                    | Appl. Catal. B 2022, 312, 121428. <sup>[17]</sup>                    |
| Fibrous RP     | Pt                                   | Methanol                                           | 300W Xe lamp >420 nm           | 684                                                                   | Angew. Chem. Int. Ed. 2016, 55, 9580-9585. <sup>[18]</sup>           |
| RP             | 2 wt% Pt                             | Methanol                                           | 300W Xe lamp >420 nm           | 21                                                                    | Appl. Catal. B 2021, 297, 120412 <sup>[19]</sup>                     |
| RP             | 0.5 wt% Au                           | TEOA                                               | 300W Xe lamp >420 nm           | 88                                                                    | Catal. Commun. 2021, 149, 106197 <sup>[20]</sup>                     |
| Dendritic RP   | 1 wt% Pt                             | Methanol                                           | 300W Xe lamp >420 nm           | 1280                                                                  | Appl. Catal. B 2022, 312, 121428 <sup>[21]</sup>                     |
| HRP            | 7.4 wt% Ni                           | N/A                                                | 300W Xe lamp >420 nm           | 88                                                                    | Angew. Chem. Int. Ed. 2022, 61, e202204711 <sup>[22]</sup>           |
| Crystalline RP | 1 wt% Pt                             | Methanol                                           | 300W Xe lamp >420 nm           | 1.6                                                                   | Appl. Catal. B 2012, 111-112, 409-414. <sup>[23]</sup>               |
| Crystalline Si | N/A                                  | Methanol                                           | 300W Xe lamp >420 nm           | 882                                                                   | Nat. Commun. 2014, 5, 3605. <sup>[24]</sup>                          |
| α-S            | N/A                                  | N/A                                                | 300W Xe lamp >420 nm           | N/A                                                                   | J. Am. Chem. Soc. 2012, 134, 9070-9073 <sup>[25]</sup>               |
| Se             | N/A                                  | N/A                                                | 300W Xe lamp >420 nm           | N/A                                                                   | J. Am. Chem. Soc., 2016, 138, 5206-5209 <sup>[26]</sup>              |
| B              | N/A                                  | N/A                                                | 300W Xe lamp >420 nm           | N/A                                                                   | Angew. Chem. Int. Ed. 2017, 56, 15506-15518 <sup>[27]</sup>          |
| Sb             | N/A                                  | N/A                                                | 300W Xe lamp >420 nm           | N/A                                                                   | Adv. Sustainable Syst. 2019, 3, 1800138 <sup>[28]</sup>              |

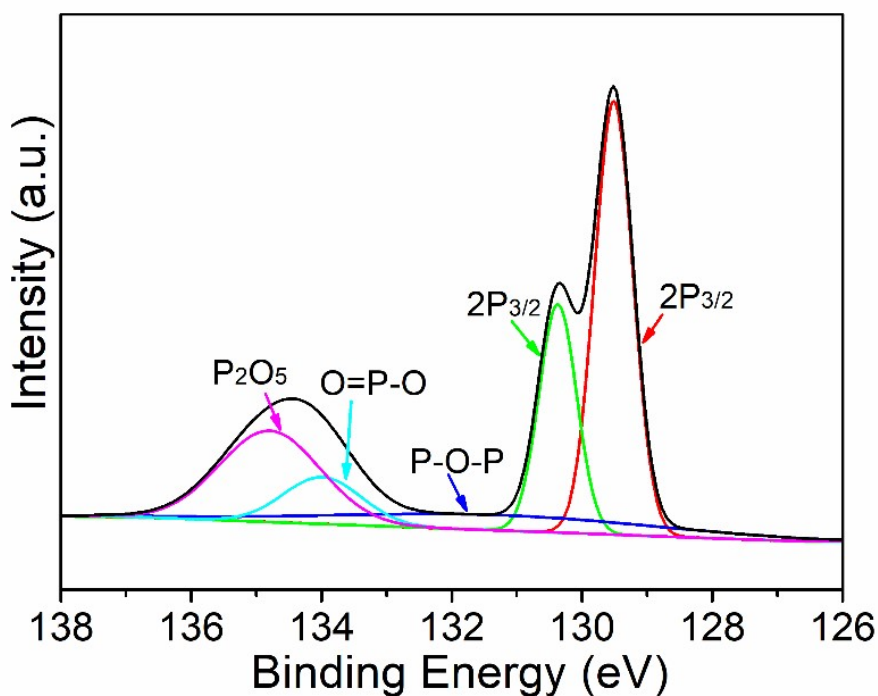

**Fig. S15.** XPS spectra of VPQDs after reaction.

**Table S6.** The intensity ratio of  $P_xO_y$  to P=P in the XPS spectra of VPQDs before and after reaction.

| Samples                 | $P_xO_y$ | P=P  | $P_xO_y/P=P$ |
|-------------------------|----------|------|--------------|
| VPQDs (before reaction) | 27.7     | 72.3 | 0.383        |
| VPQDs (after reaction)  | 29.6     | 70.4 | 0.420        |

**Table S7.** Kinetic parameters of TAS decays of bulk VP and VPQDs under 400 nm excitation with time profiles of absorption probed at 500-700 nm.

| Samples | $\tau_1$       | $\tau_2$      | Averaget |
|---------|----------------|---------------|----------|
| Bulk VP | 696.6 ps (69%) | 35.6 ps (31%) | 681.8 ps |

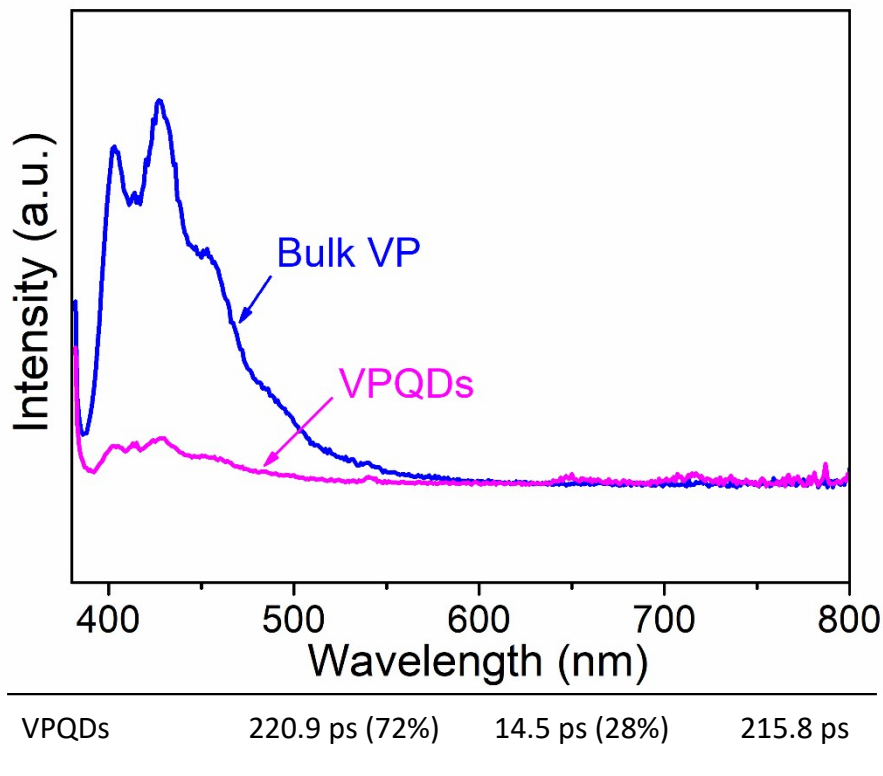

**Fig. S16.** Steady-state PL emission spectra of Rh-loaded VPQDs and the bulk VP crystals.

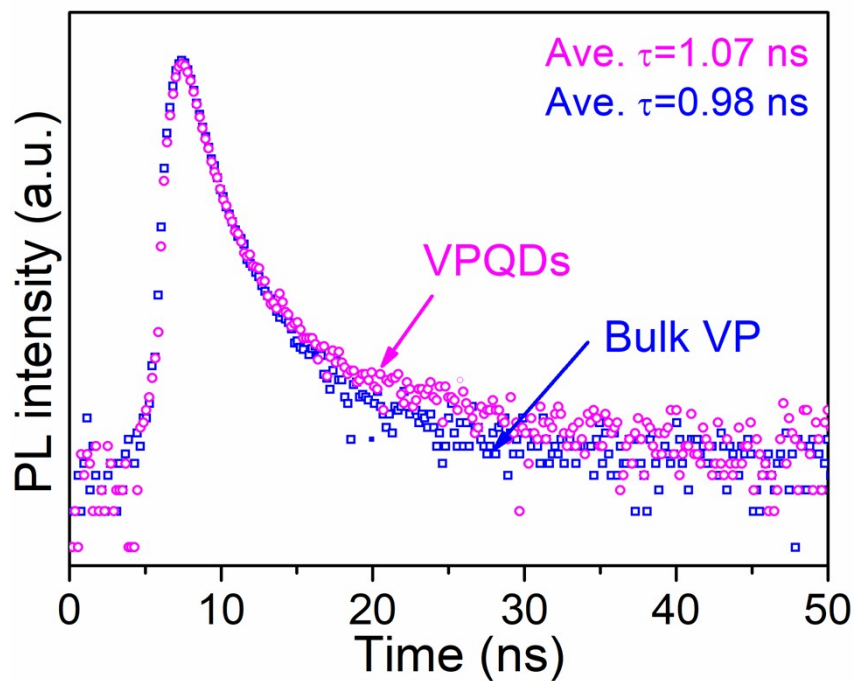

**Fig. S17.** The corresponding time-resolved PL spectra of Rh-loaded VPQDs and the bulk VP crystals.



## References

- [1] K. Momma, F. Izumi, *J. Appl. Crystallogr.*, **2011**, 44, 1272–1276.
- [2] X. Zhu, T. Zhang, Z. Sun, H. Chen, J. Guan, X. Chen, H. Ji, P. Du, S. Yang, *Adv. Mater.*, **2017**, 29, 1605776.
- [3] M. Zhu, S. Kim, L. Mao, M. Fujitsuka, J. Zhang, X. Wang, T. Majima, *J. Am. Chem. Soc.*, **2017**, 139, 13234–13242.
- [4] X. Wang, B. Zhou, Y. Zhang, L. Liu, J. Song, R. Hu, J. Qu, *J. Alloys Comp.*, **2018**, 769, 316–324.
- [5] R. Zhao, S. Liu, X. Zhao, Y. Cheng, J. Zhang, *Adv. Mater. Interfaces*, **2022**, 2200705.
- [6] L. Zhang, H. Huang, Z. Lv, L. Li, M. Gu, X. Zhao, B. Zhang, Y. Cheng, J. Zhang, *ACS Appl. Electron. Mater.*, **2021**, 3, 1043–1049.
- [7] R. Zhao, X. Zhao, X. Xu, Y. Zhang, Y. Wang, M. Jin, Z. Liu, Y. Cheng, H. Zheng, J. Zhang, *J. Phys. Chem. Lett.*, **2022**, 13, 35, 8236–8244.
- [8] a) F. Liu, R. Shi, Z. Wang, Y. Weng, C. -M. Che, Y. Chen, *Angew. Chem. Int. Ed.*, **2019**, 58, 11791–11795.
- [9] Y. Zhu, C. Lv, Z. Yin, J. Ren, X. Yang, C. -L. Dong, H. Liu, R. Cai, Y. -C. Huang, W. Theis, S. Shen, D. Yang, *Angew. Chem. Int. Ed.*, **2020**, 59, 868–873.
- [10] M. Gu, L. Zhang, S. Mao, Y. Zou, D. Ma, J. Shi, N. Yang, C. Fu, X. Zhao, X. Xu, Y. Cheng, J. Zhang, *Chem. Commun.*, 2022, **58**, 12811.
- [11] R. Boppella, W. Yang, J. Tan, H. -C. Kwon, J. Park, J. Moon, *Appl. Catal. B*, 2019, 242, 422–430.
- [12] M. Zhu, Z. Sun, M. Fujitsuka, T. Majima, *Angew. Chem. Int. Ed.*, **2018**, 57, 2160–2164.
- [13] B. Tian, B. Tian, B. Smith, M. C. Scott, Q. Lei, R. Hua, Y. Tian, Y. Liu, *Proc. Natl. Acad. Sci. U. S. A.*, **2018**, 115, 4345–4350
- [14] B. Tian, B. Tian, B. Smith, M. C. Scott, R. Hua, Q. Lei, Y. Tian, *Nat. Commun.*, **2018**, 9, 1397.
- [15] L. Jing, R. Zhu, Y. H. Ng, Z. Hu, W. Y. Teoh, D. L. Phillips, J. C. Yu, *J. Chem. Phys.*, **2020**, 153, 024707.
- [16] L. Jing, R. Zhu, D. L. Phillips, J. C. Yu, *Adv. Funct. Mater.*, **2017**, 27, 1703484.
- [17] C. Wu, R. Zhu, W. Y. Teoh, Y. Liu, J. Deng, H. Dai, L. Jing, Y. H. Ng, J. C. Yu, *Appl. Catal. B*, **2022**, 312, 121428.
- [18] Z. Hu, L. Yuan, Z. Liu, Z. Shen, J. C. Yu, *Angew. Chem. Int. Ed.*, **2016**, 55, 9580–9585.

- [19] S. Li, Y. H. Ng, R. Zhu, S. Lv, C. Wu, Y. Liu, L. Jing, J. Deng, H. Dai, *Appl. Catal. B*, **2021**, 297, 120412.
- [20] Q. Cao, M. Guo, J. Cao, H. Lin, S. Chen, *Catal. Commun.*, **2021**, 149, 106197.
- [21] C. Wu, R. Zhu, W. Y. Teoh, Y. Liu, J. Deng, H. Dai, L. Jing, Y. H. Ng, J. C. Yu, *Appl. Catal. B*, **2022**, 312, 12142.
- [22] M. Wang, S. Xu, Z. Zhou, C. -L. Dong, X. Guo, J -L. Chen, Y. -C. Huang, S. Shen, Y. Chen, L. Guo, C. Burda, *Angew. Chem. Int. Ed.*, **2022**, 61, e2022047.
- [23] F. Wang, W. K. H. Ng, J. C. Yu, H. J. Zhu, C. H. Li, L. Zhang, Z. F. Li, Q. Li, *Appl. Catal. B*, **2012**, 111-112, 409-414.
- [24] F. Dai, J. Zai, R. Yi, M. L. Gordin, H. Sohn, S. Chen, D. Wang, *Nat. Commun.*, **2014**, 5, 3605.
- [25] G. Liu, P. Niu, L. Yin, H. -M. Cheng, *J. Am. Chem. Soc.*, **2012**, 134, 9070-9073.
- [26] Y. Kawamata, T. Hashimoto, K. Maruoka, *J. Am. Chem. Soc.*, **2016**, 138, 5206-5209.
- [27] Y. Fang, X. Wang, *Angew. Chem. Int. Ed.*, **2017**, 56, 15506-15518.
- [28] J. Barrio, C. Gibaja, J. Tzadikov, M. Shalom, F. Zamora, *Adv. Sustainable Syst.*, **2019**, 3, 1800138.
